# Supplementary material for: Convergent synthesis of a steroidal antiestrogen-mitomycin C hybrid using “click” chemistry
Source: Royal Society of Chemistry journal article supplement (doi:10.1039/c2ob25902h), 2012-01-01
Supplement: c2ob25902h.pdf [file c2ob25902h.pdf]

**Supporting information.**

## **Convergent synthesis of a steroidal antiestrogen-mitomycin C hybrid using “click” chemistry**

Robert N. Hanson\*<sup>a</sup>, Edward Hua<sup>a</sup>, David Labaree<sup>b</sup>, Richard B. Hochberg<sup>b</sup>, Kyle Proffitt<sup>c</sup>, John M. Essigmann<sup>c</sup>  
and Robert G. Croy<sup>c</sup>

<sup>a</sup>Department of Chemistry and Chemical Biology, Northeastern University, Boston, MA

<sup>b</sup>Department of Obstetrics and Gynecology, Yale University School of Medicine, New Haven CT

<sup>c</sup>Department of Chemistry, Massachusetts Institute of Technology, Cambridge, MA

E-mail: [r.hanson@neu.edu](mailto:r.hanson@neu.edu)

Biological assays and graphs/figures  
Spectral data for intermediates and final compound

Ishikawa 12-11-06

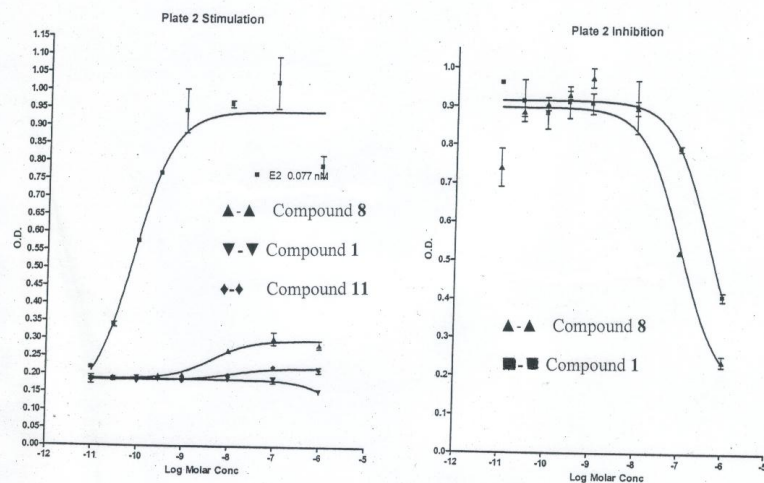

The potency of the compounds was determined in an estrogen bioassay, the induction of alkaline phosphatase in human endometrial adenocarcinoma cells (Ishikawa) grown in 96-well microtiter plates. The cells were grown in phenol red free medium with estrogen depleted (charcoal stripped) bovine serum in the presence or absence of varying amounts of the steroids, across a dose range of at least 6 orders of magnitude. For antagonists, the effect ( $K_i$ ) of each compound tested at a range of  $10^{-6}$  M to  $10^{-12}$  M was measured for the inhibition of the action of  $10^{-9}$  M  $E_2$  ( $EC_{50} \sim 0.2$  nM). Each compound was analyzed in at least 3 separate experiments performed in duplicate. The  $K_i$  and RSA ( $RSA = \text{ratio of } 1/EC_{50} \text{ of the steroid analog to that of } E_2 \times 100$ ) were determined using the curve fitting program Prism.

## Toxicity Assay

Measurement of the toxicity of MMC and (1) toward MCF-7 (ER+) and MDA-MB231 (ER-) cell lines. Cell lines were obtained from the American Type Culture Collection, (Rockville, MD). They were grown in Minimal Essential Media (MEM) containing phenol red (GIBCO BRL, Rockville, MD) supplemented with 10% fetal bovine serum (Biowhittaker, Walkersville, MD), 2 mM glutamine and 1 mM sodium pyruvate in a 5% CO<sub>2</sub>/95% air atmosphere. Cells were seeded at  $2 \times 10^5$  per well in 6-well plates and, 48 h later, test compounds were added to the growth medium. After 24 h treatment, cells were trypsinized, suspended in Isoton and counted using a Coulter Counter.

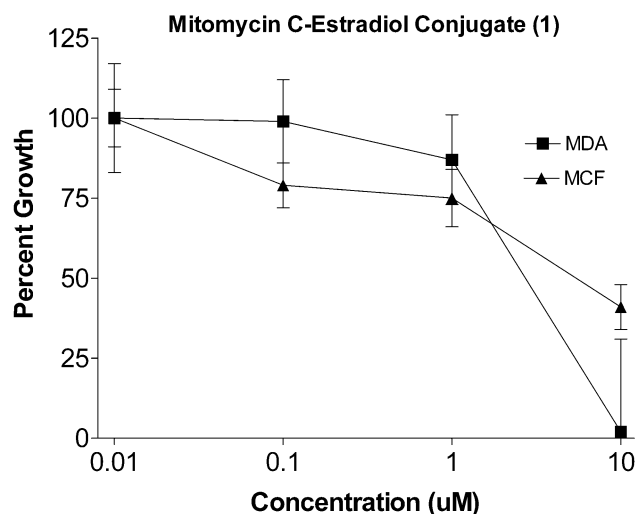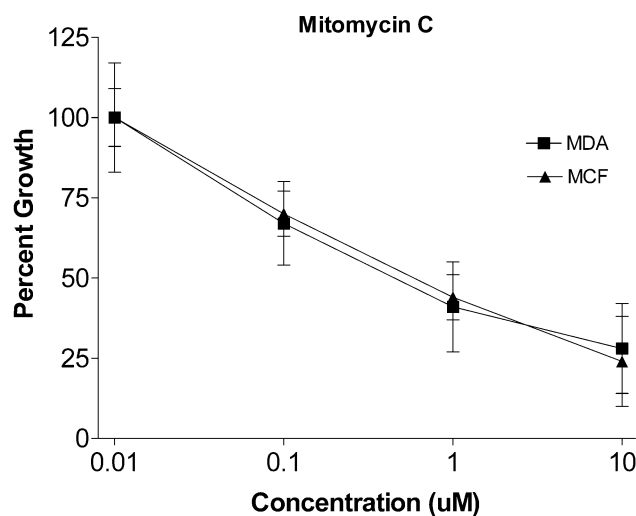

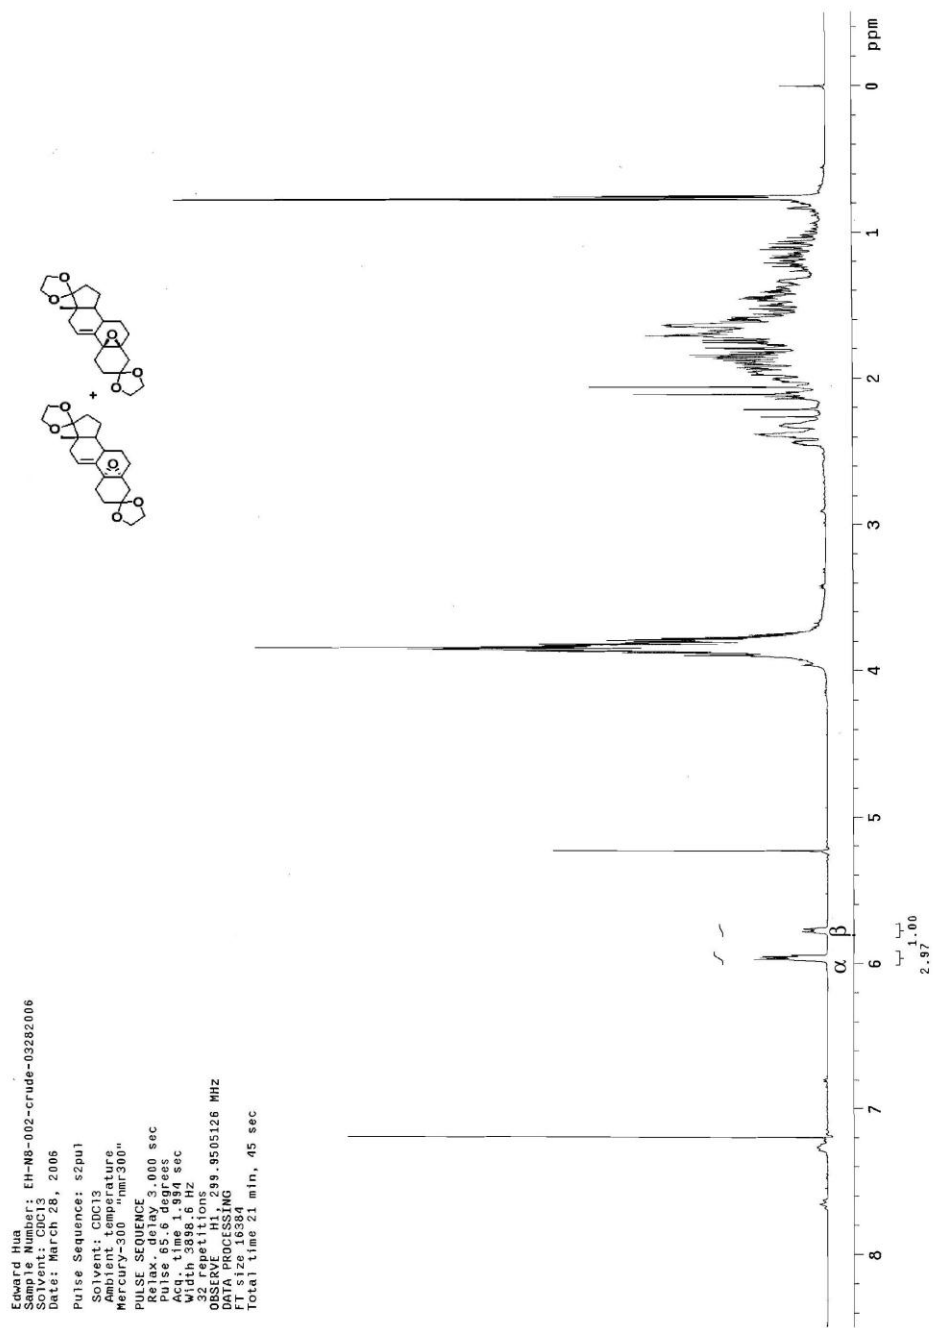

# <sup>1</sup>H NMR spectrum of mixture of compounds 3 and 4 in CDCl<sub>3</sub>

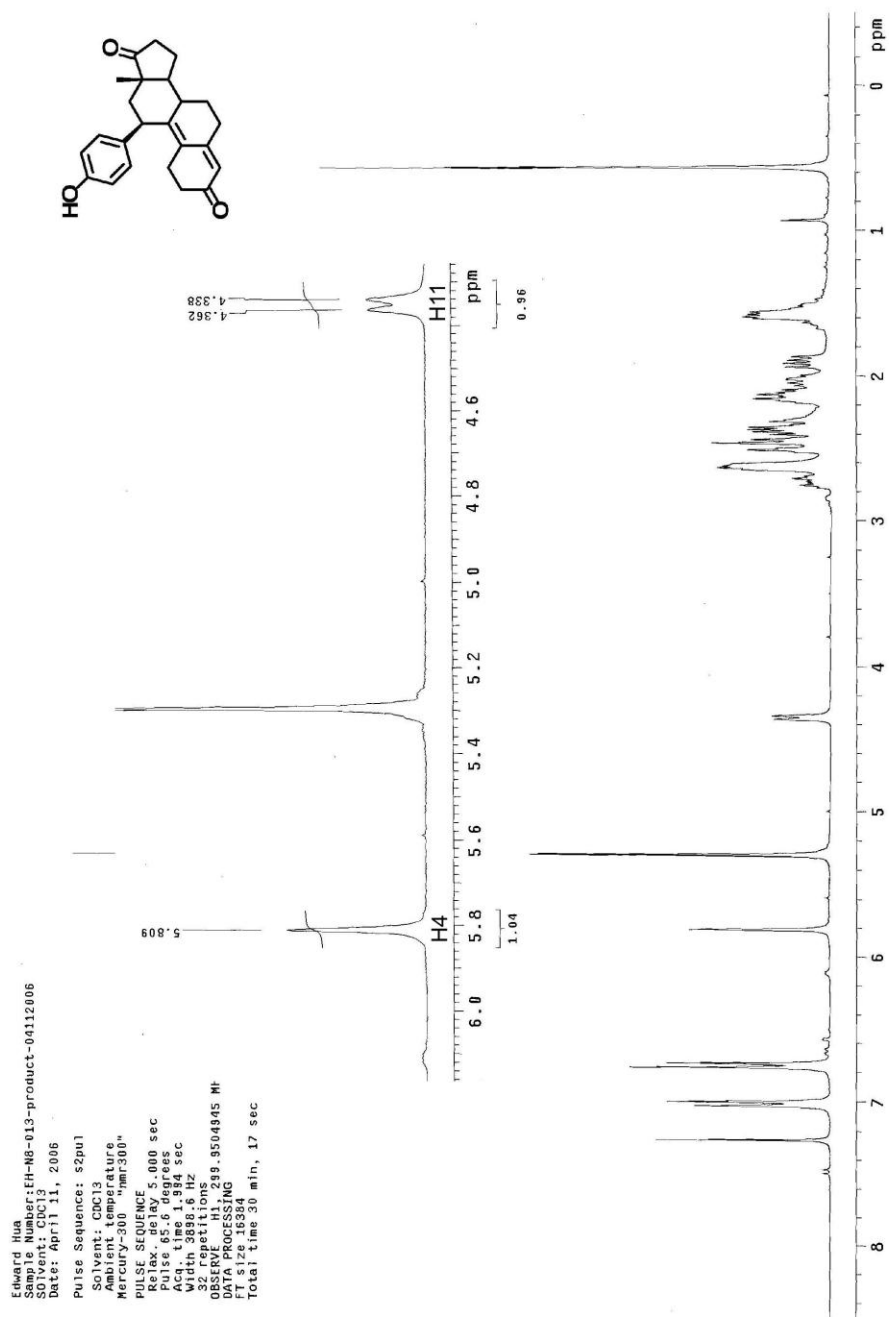

### <sup>1</sup>H NMR spectrum of compound 5 in CDCl<sub>3</sub>

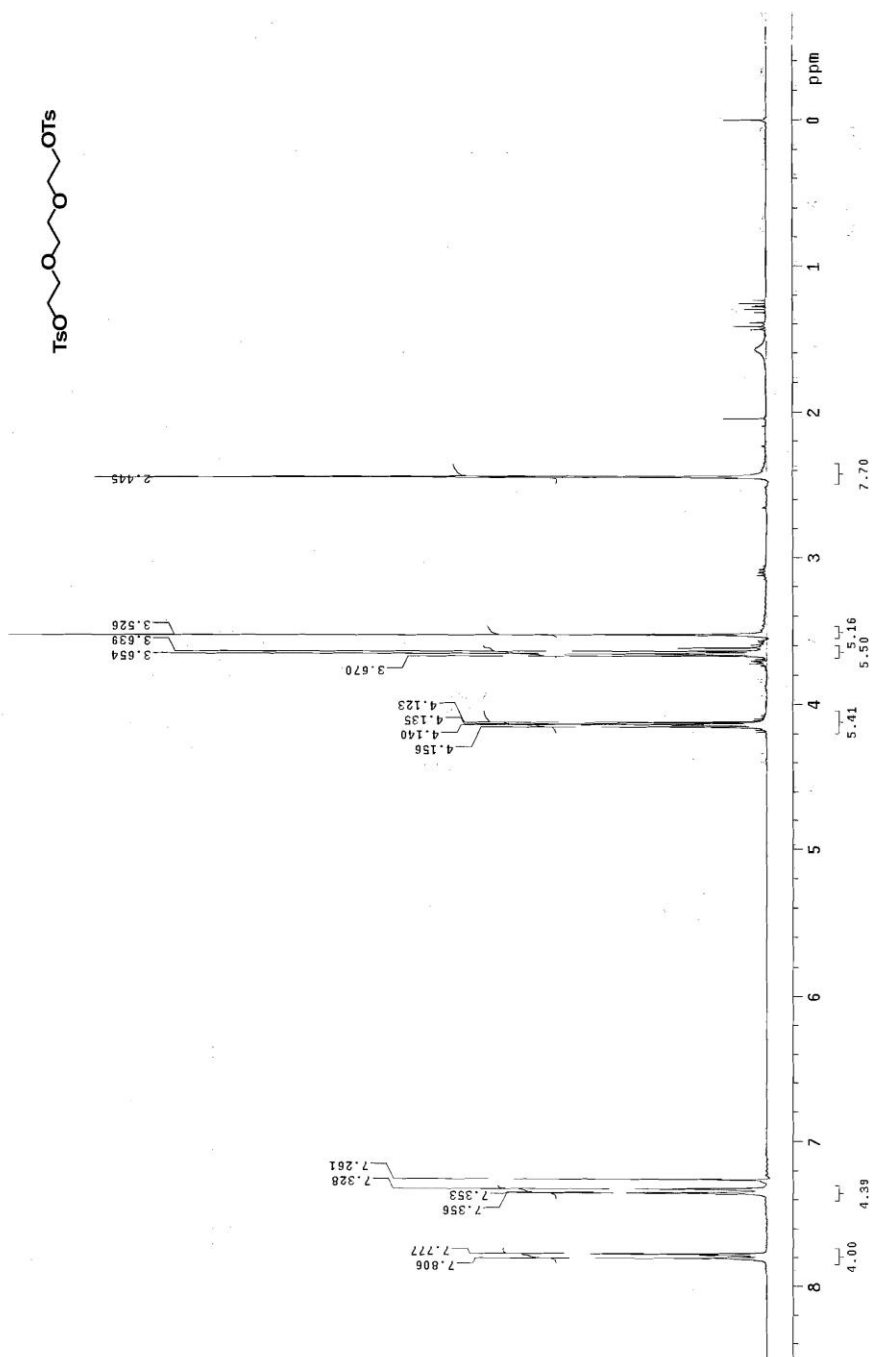

**$^1\text{H}$  NMR spectrum of compound 6 in  $\text{CDCl}_3$**

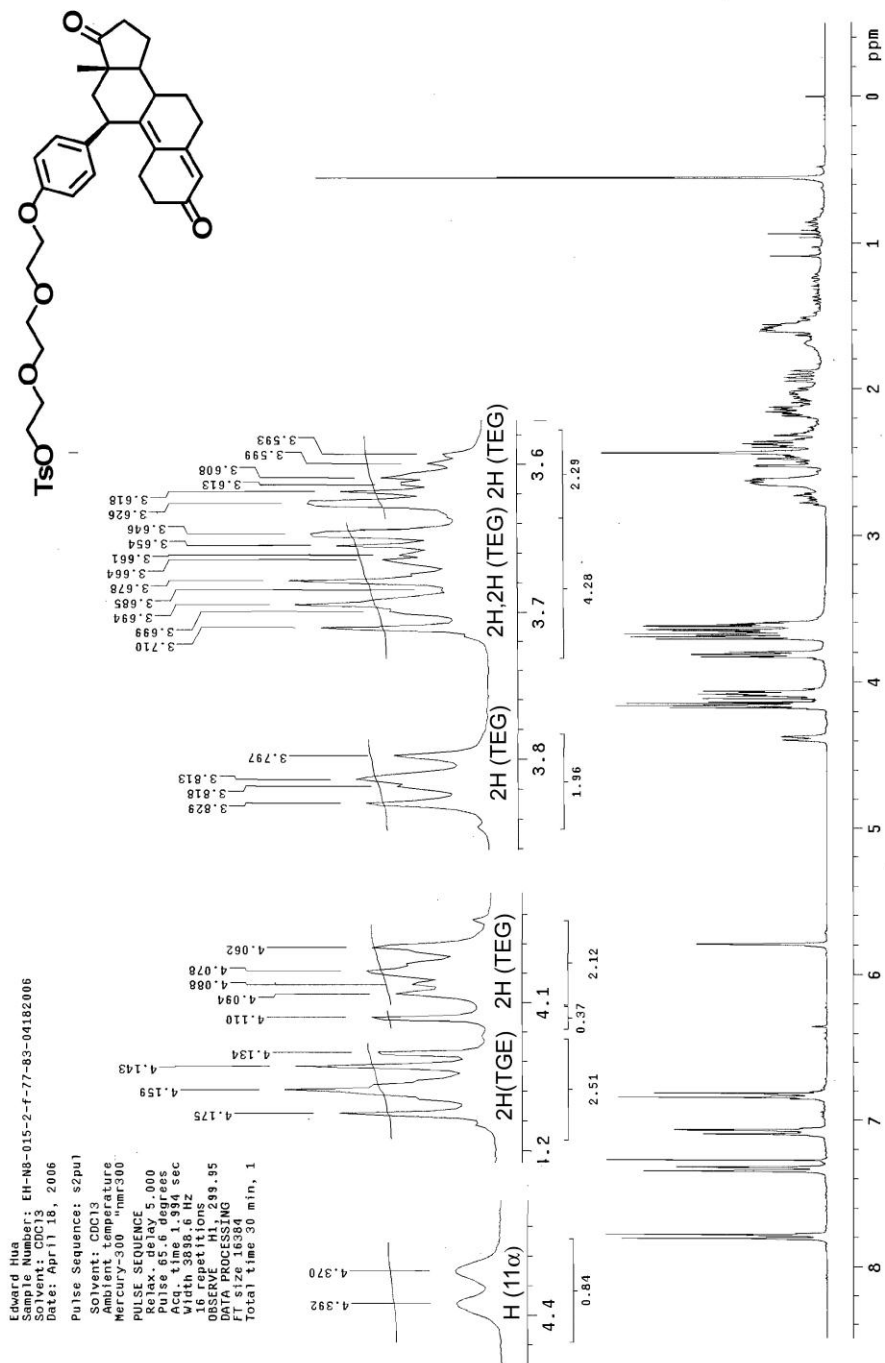

**<sup>1</sup>H NMR spectrum of intermediate in synthesis of 7, in CDCl<sub>3</sub> (2)**





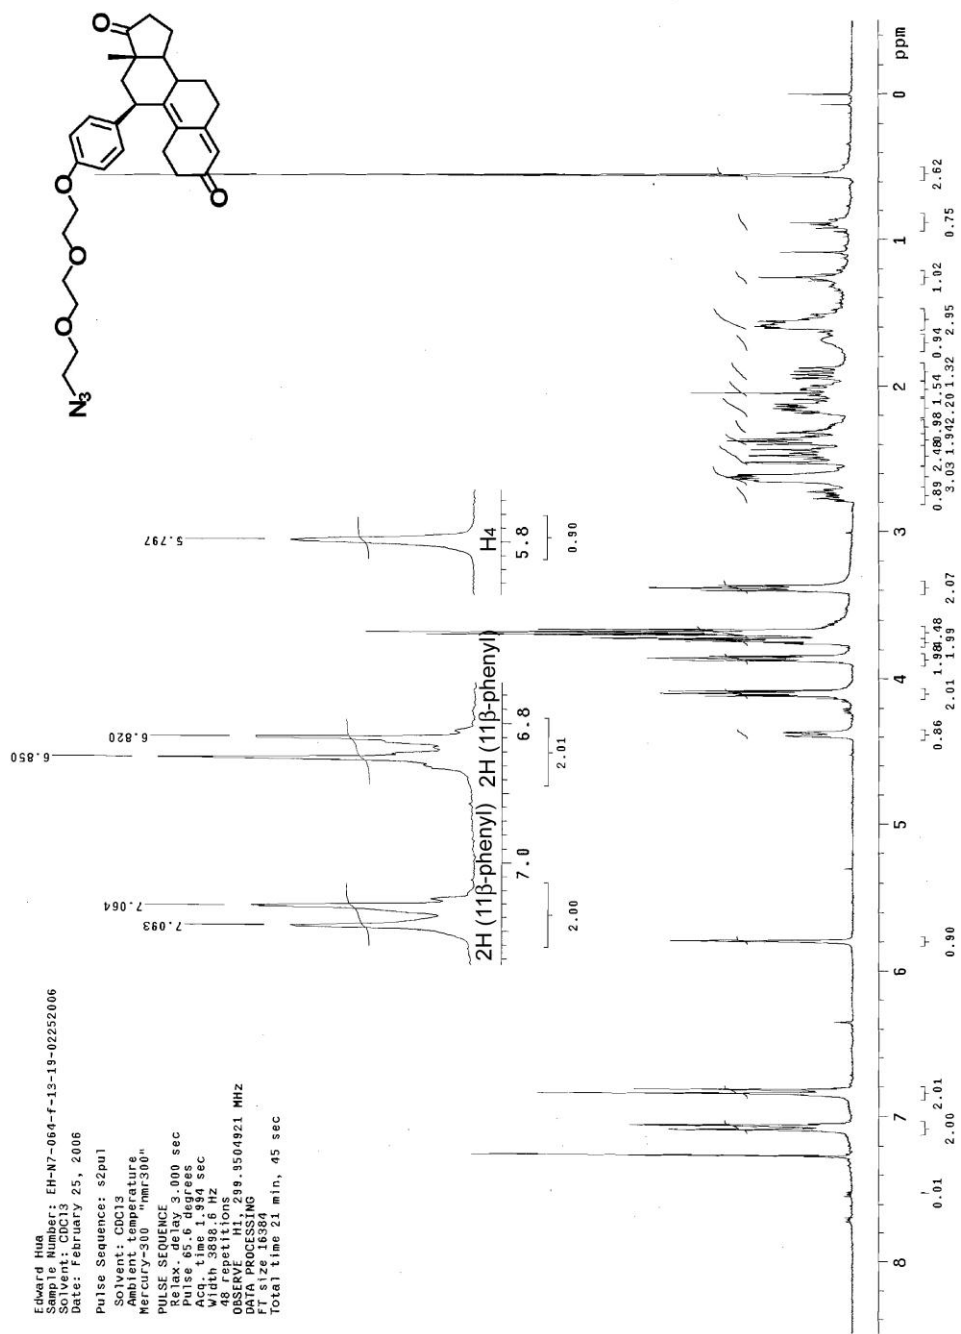



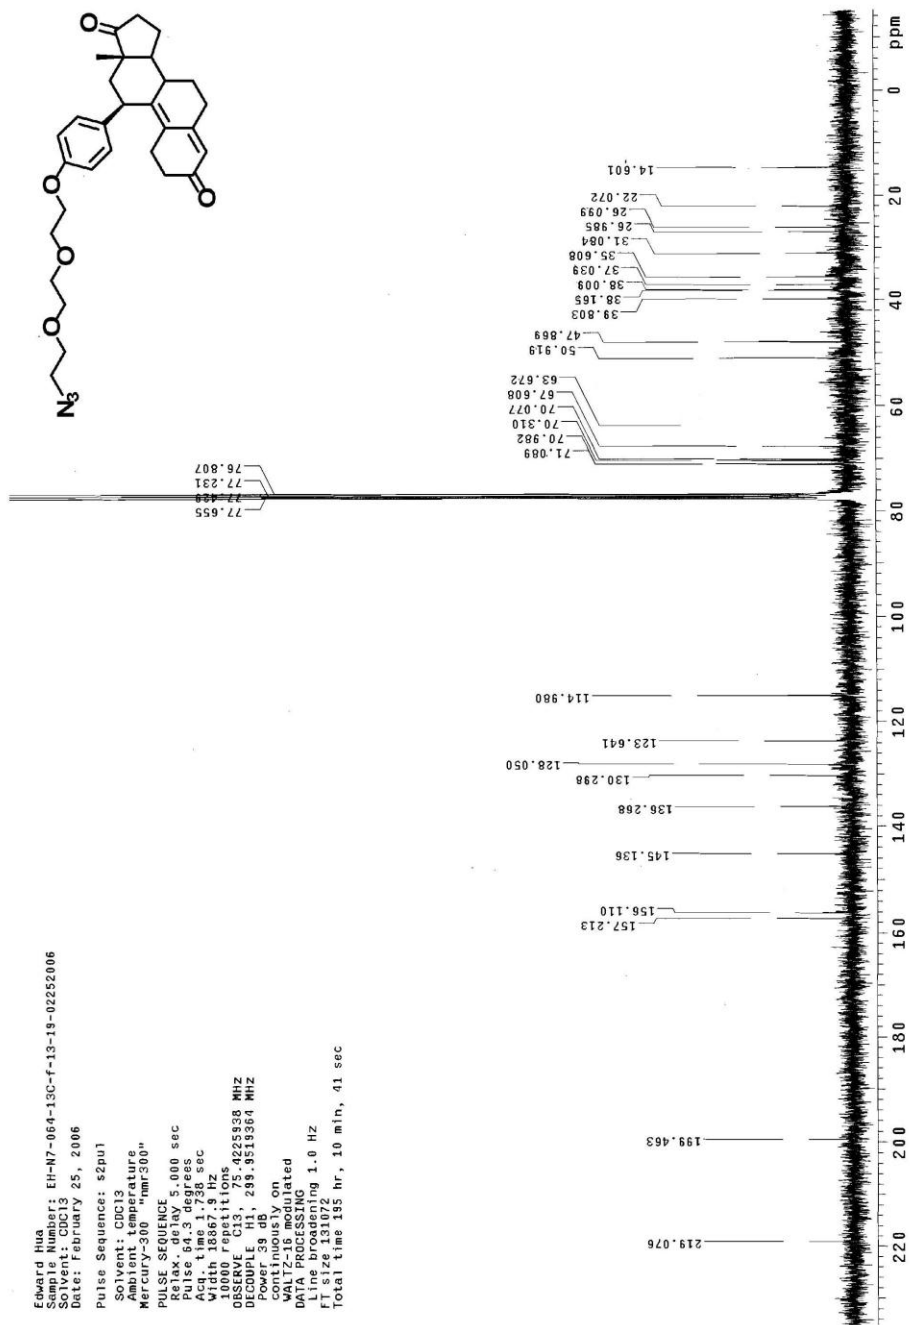

<sup>13</sup>C NMR spectrum of compound 7 in CDCl<sub>3</sub>



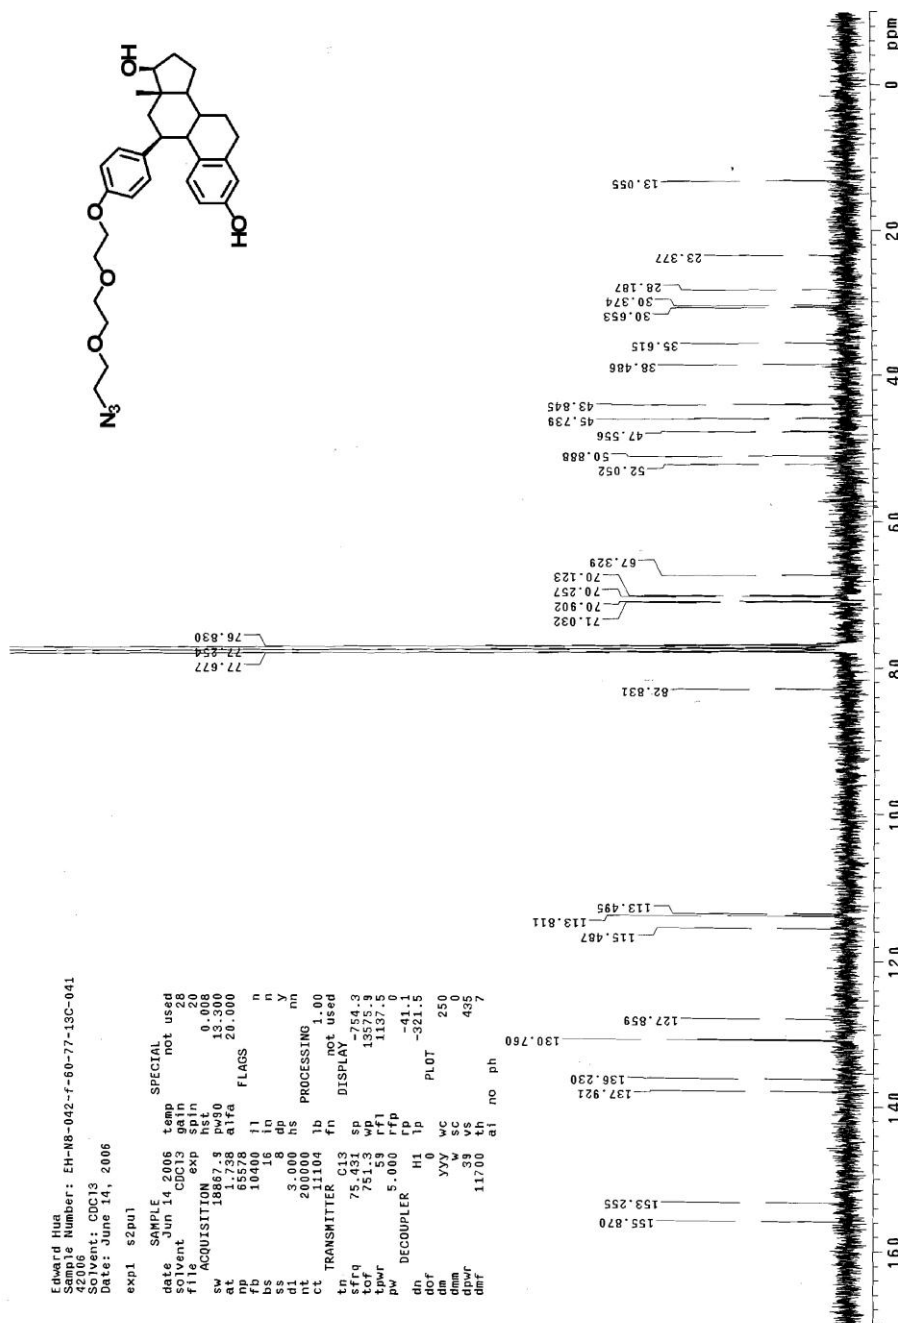



### $^1\text{H}$ NMR spectrum of compound 10 in $\text{CDCl}_3$

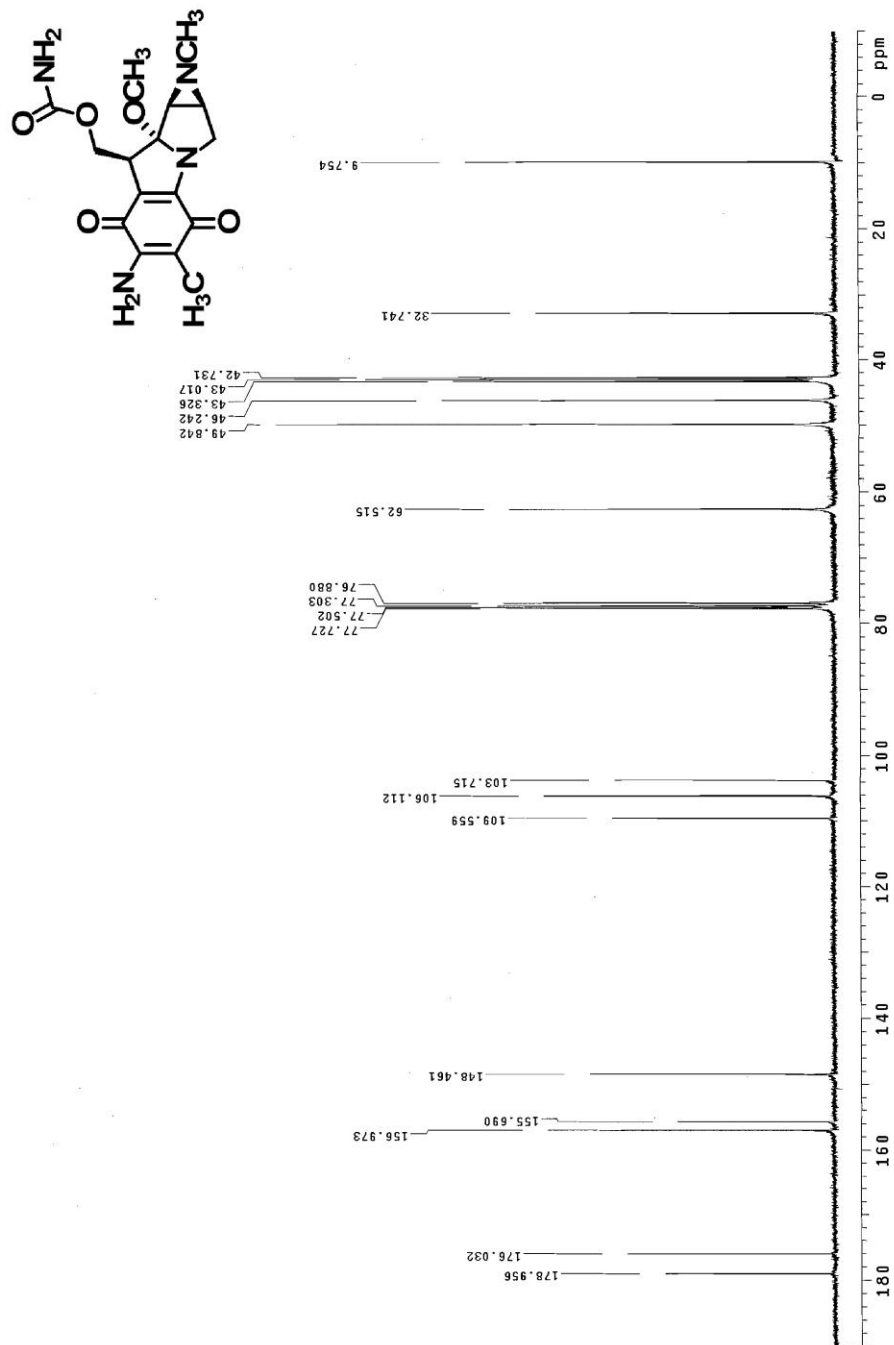



**$^{13}\text{C}$  NMR spectrum of compound 10 in  $\text{CDCl}_3$**

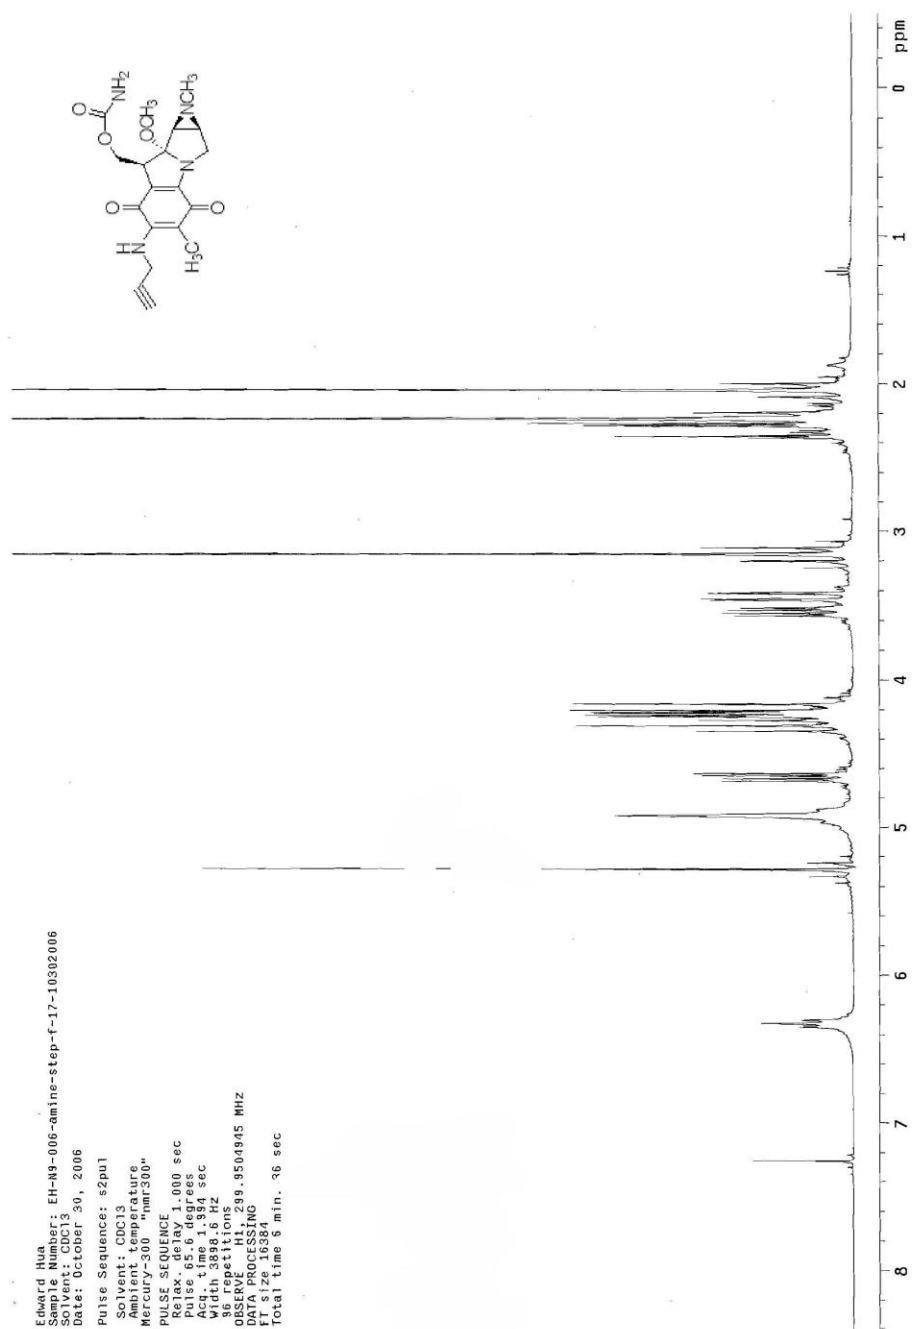

<sup>1</sup>H NMR spectrum of compound 11 in methanol-*d*<sub>4</sub> (1)

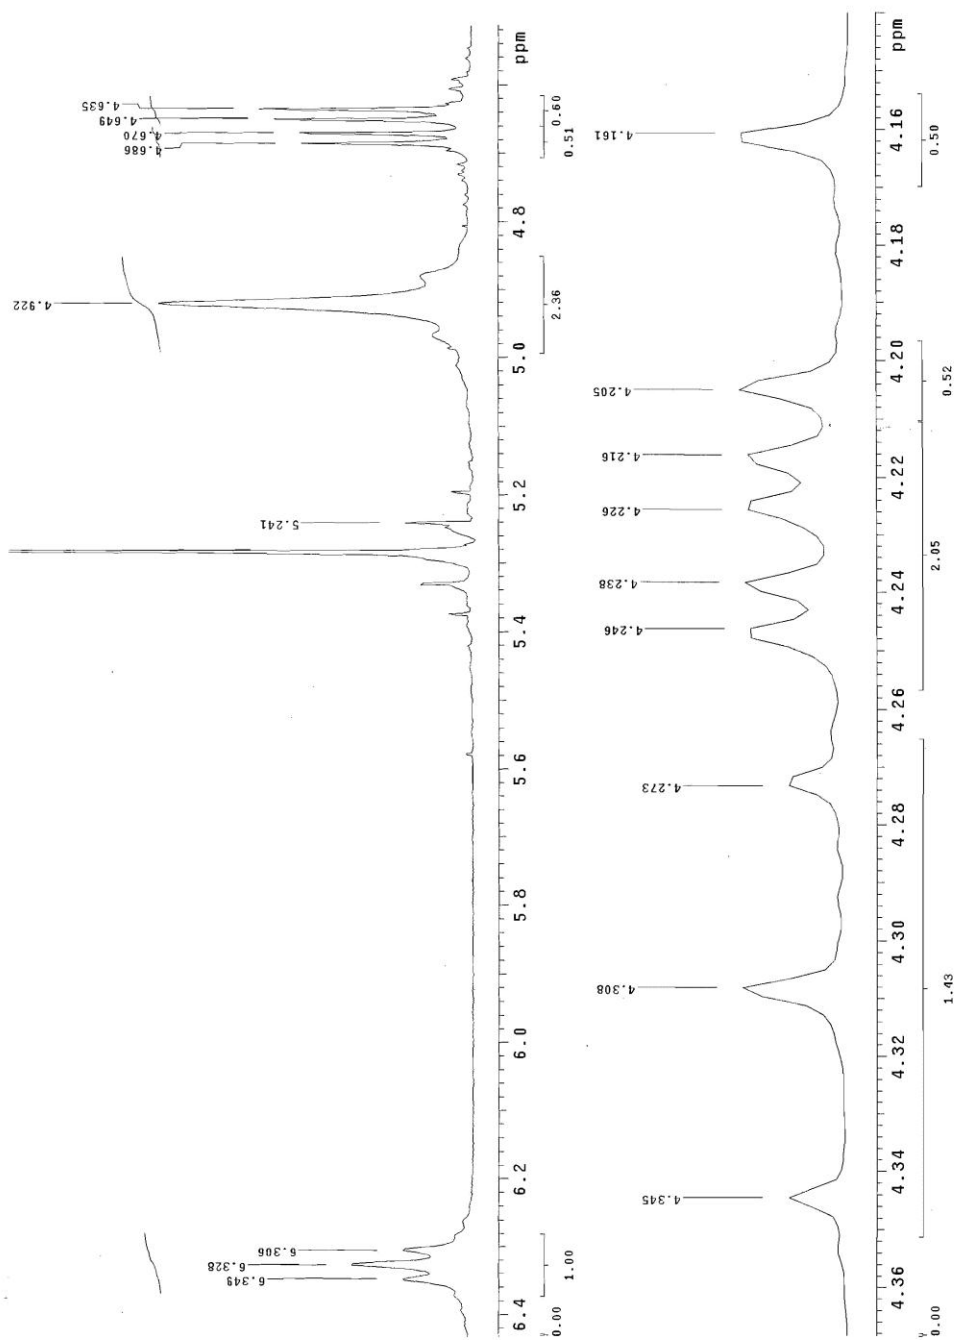

$^1\text{H}$  NMR spectrum of compound 11 in methanol- $d_4$  (2)

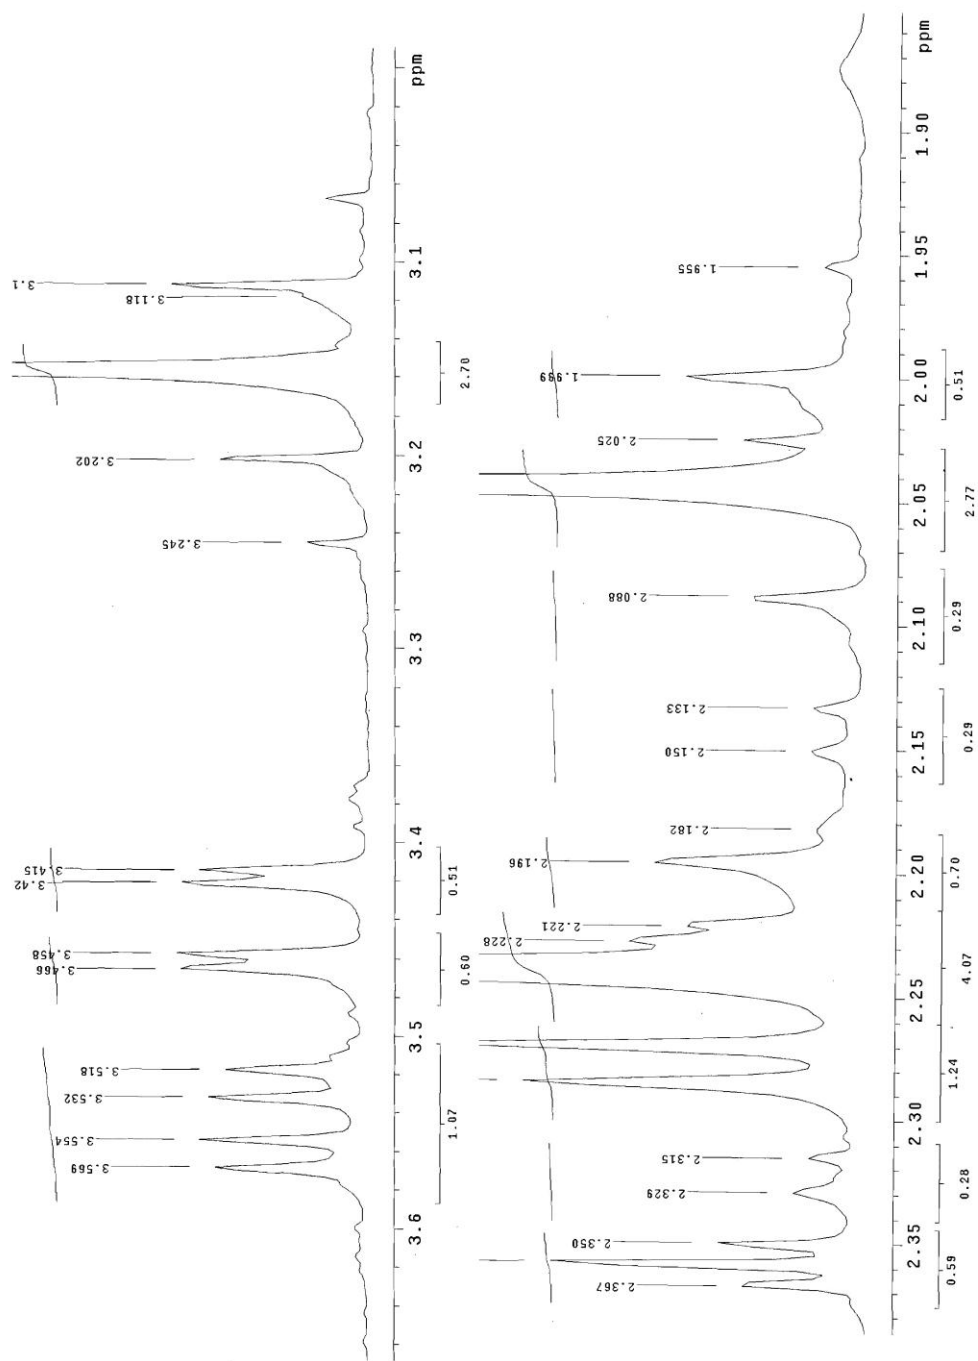

$^1\text{H}$  NMR spectrum of compound 11 in methanol- $d_4$  (3)

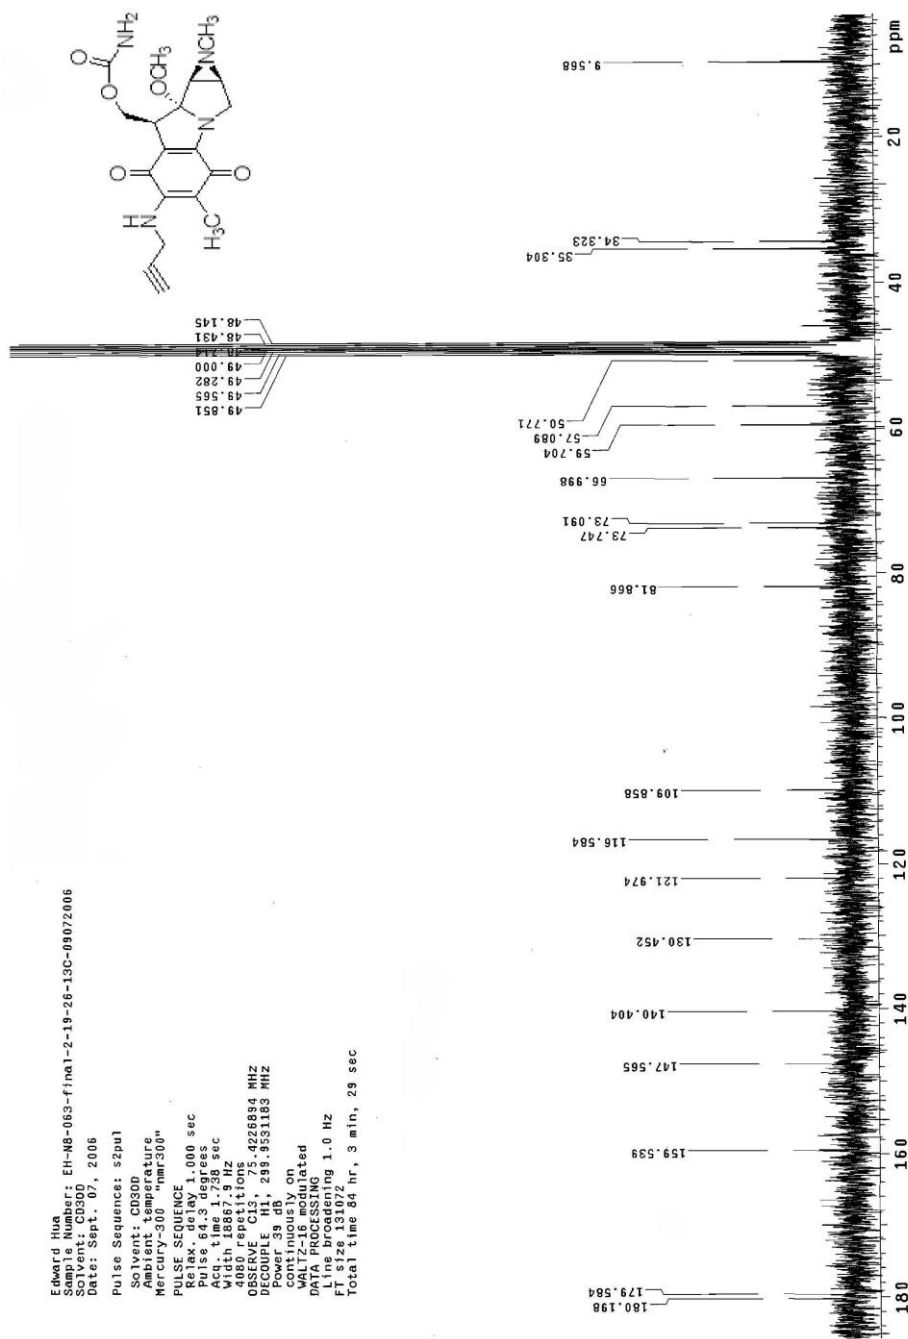

$^{13}\text{C}$  NMR spectrum of compound **11** in methanol- $d_4$

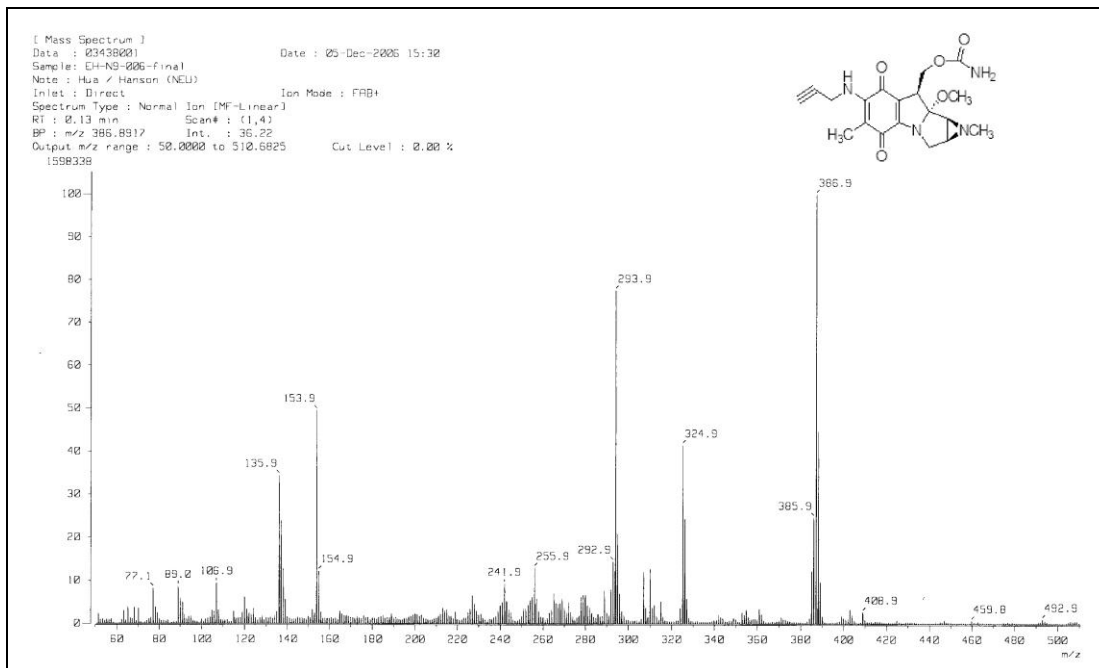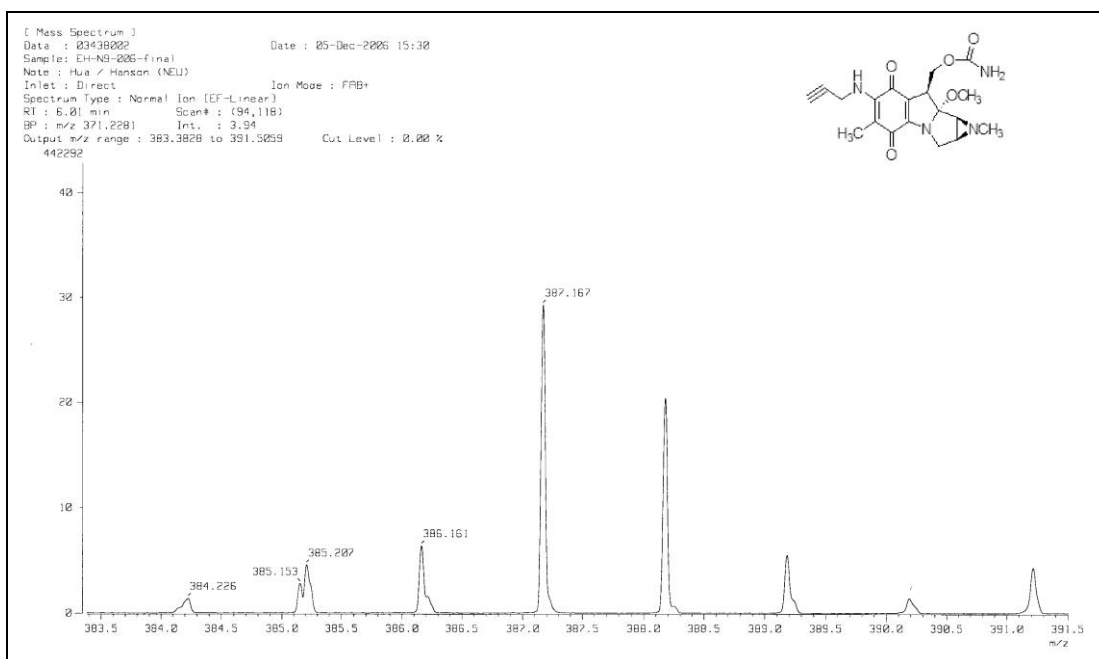

HRMS of compound 11



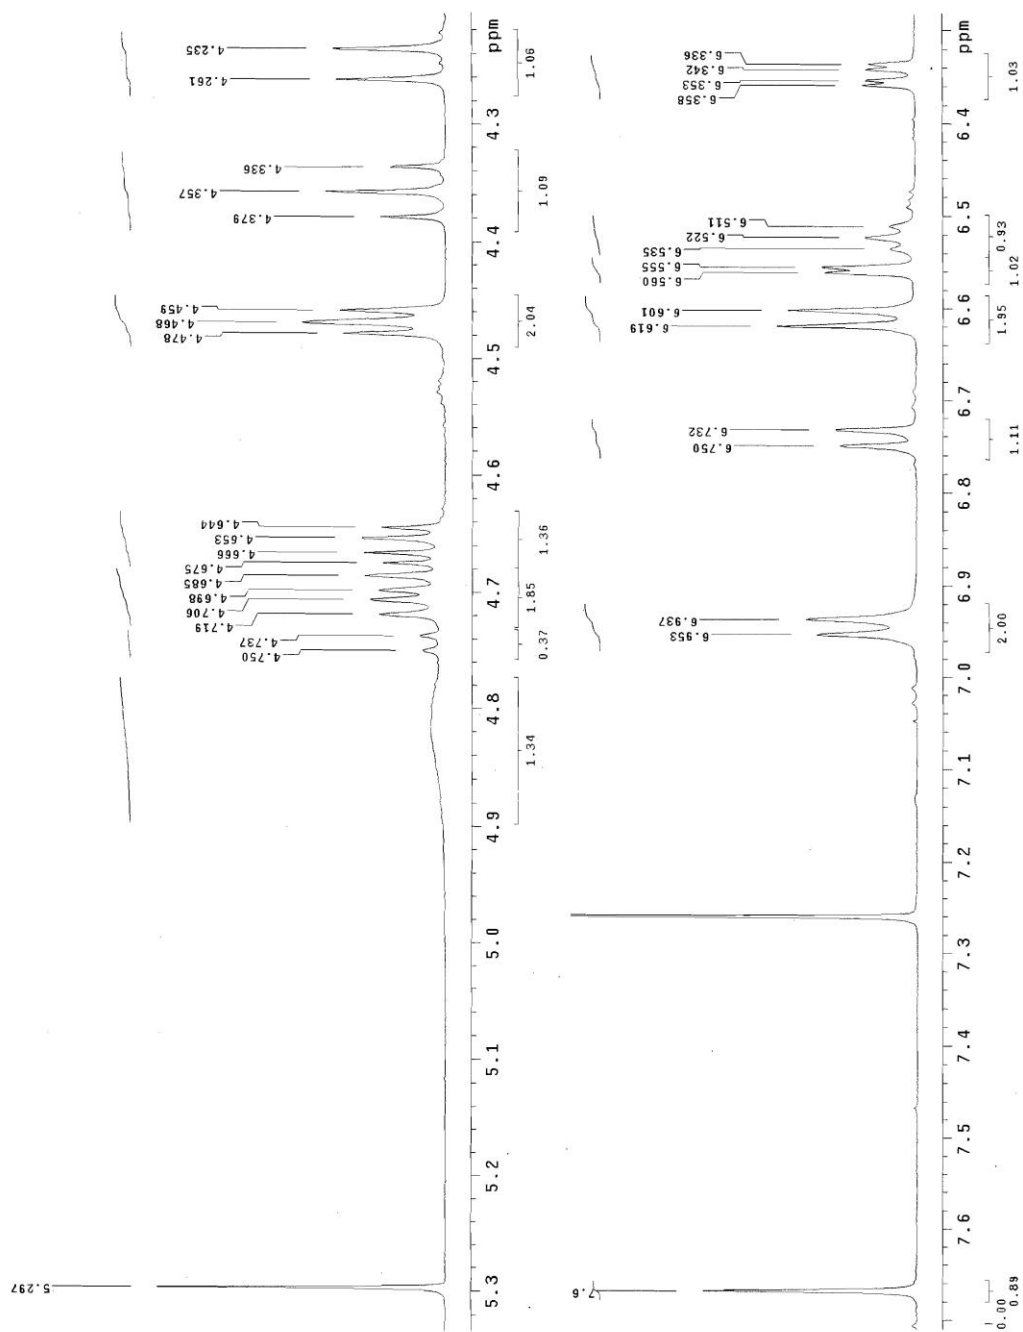

<sup>1</sup>H NMR spectrum of compound 1 in CDCl<sub>3</sub>



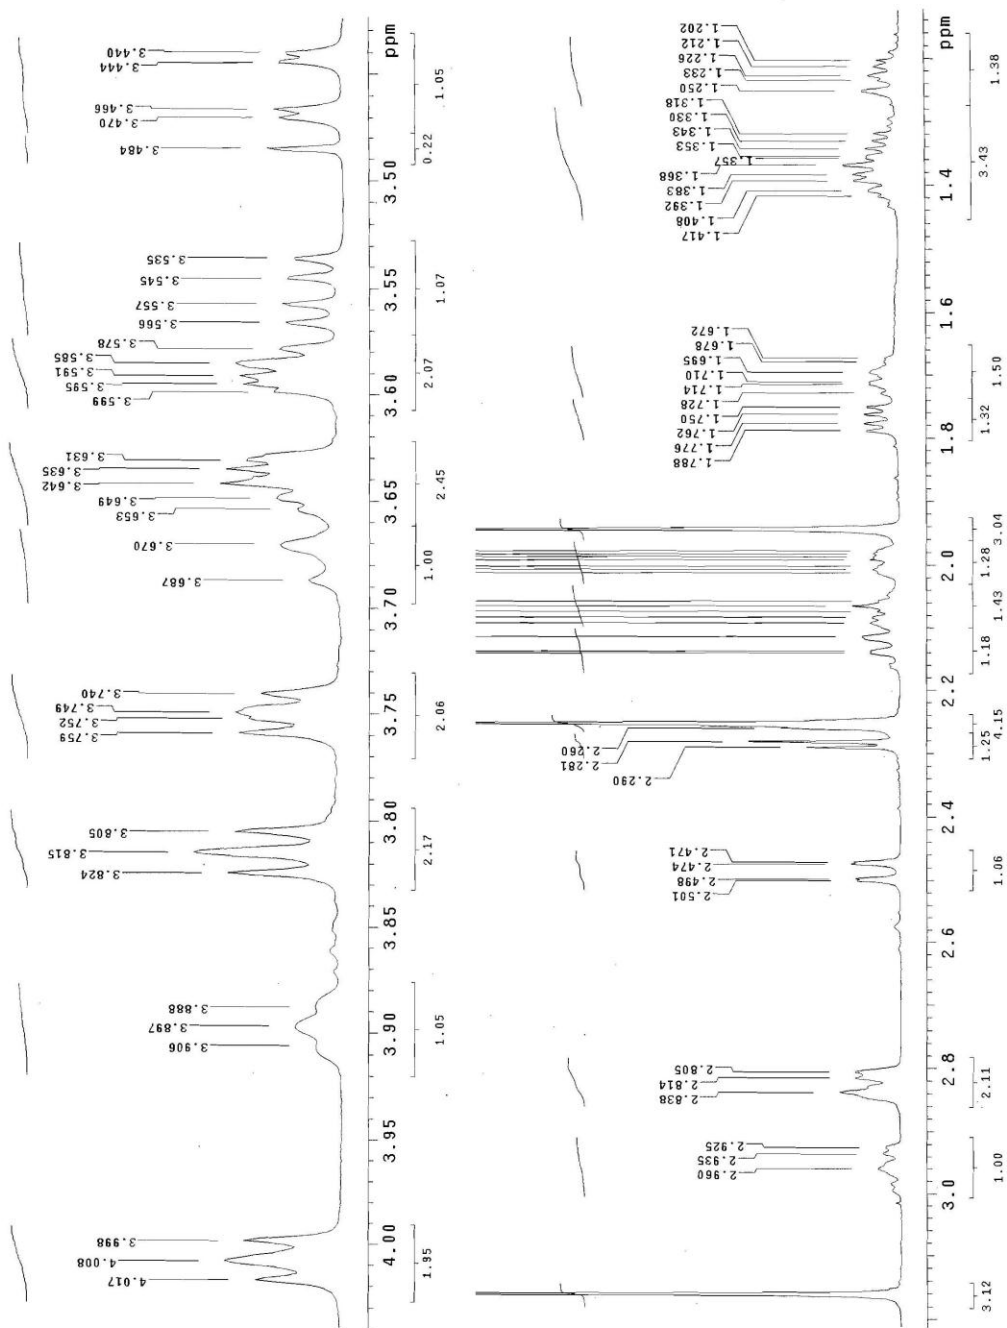

### <sup>1</sup>H NMR spectrum of compound 1 in CDCl<sub>3</sub>

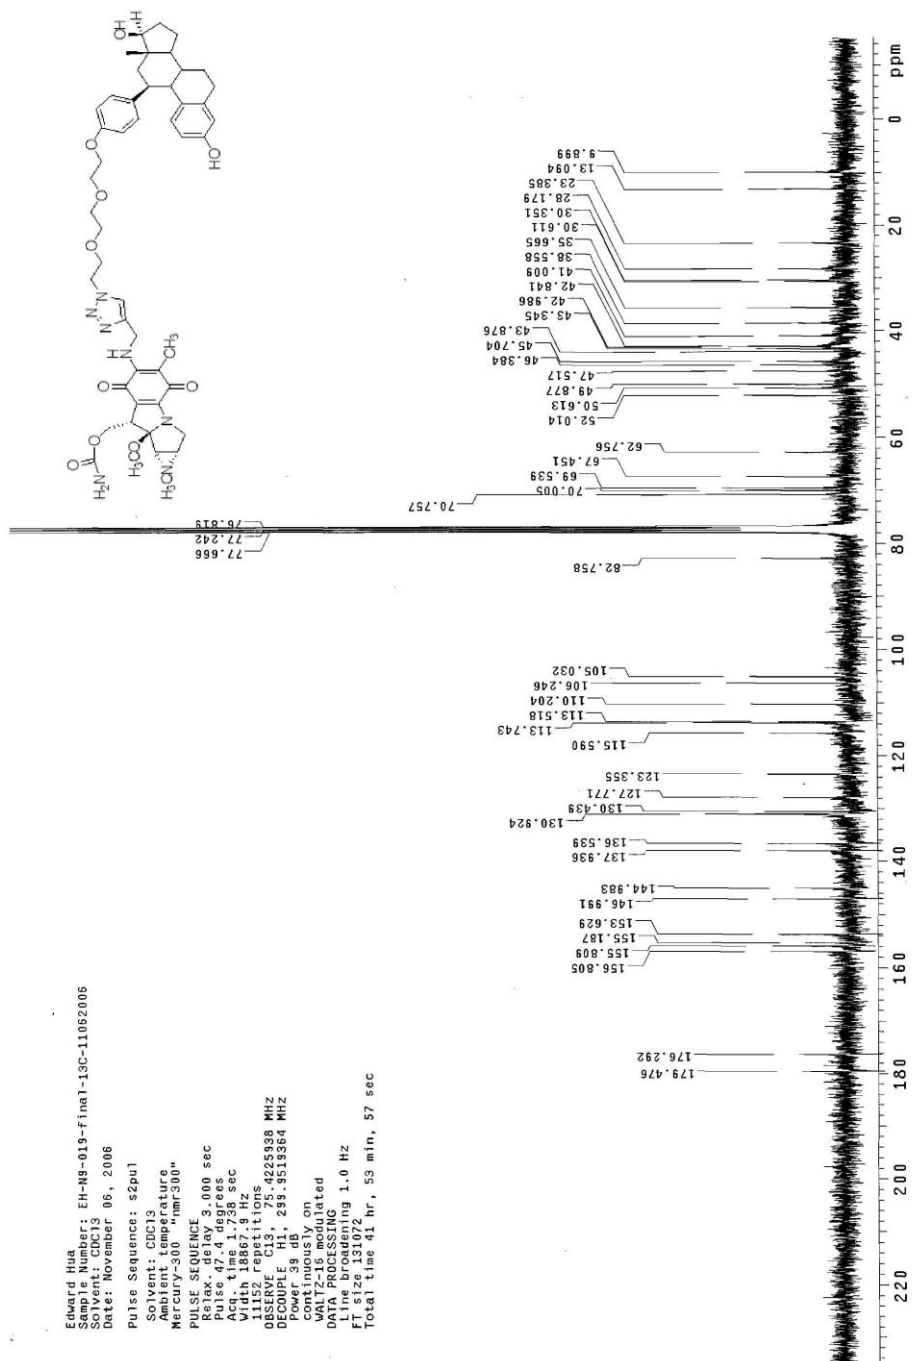

### $^{13}\text{C}$ NMR spectrum of compound 1 in $\text{CDCl}_3$

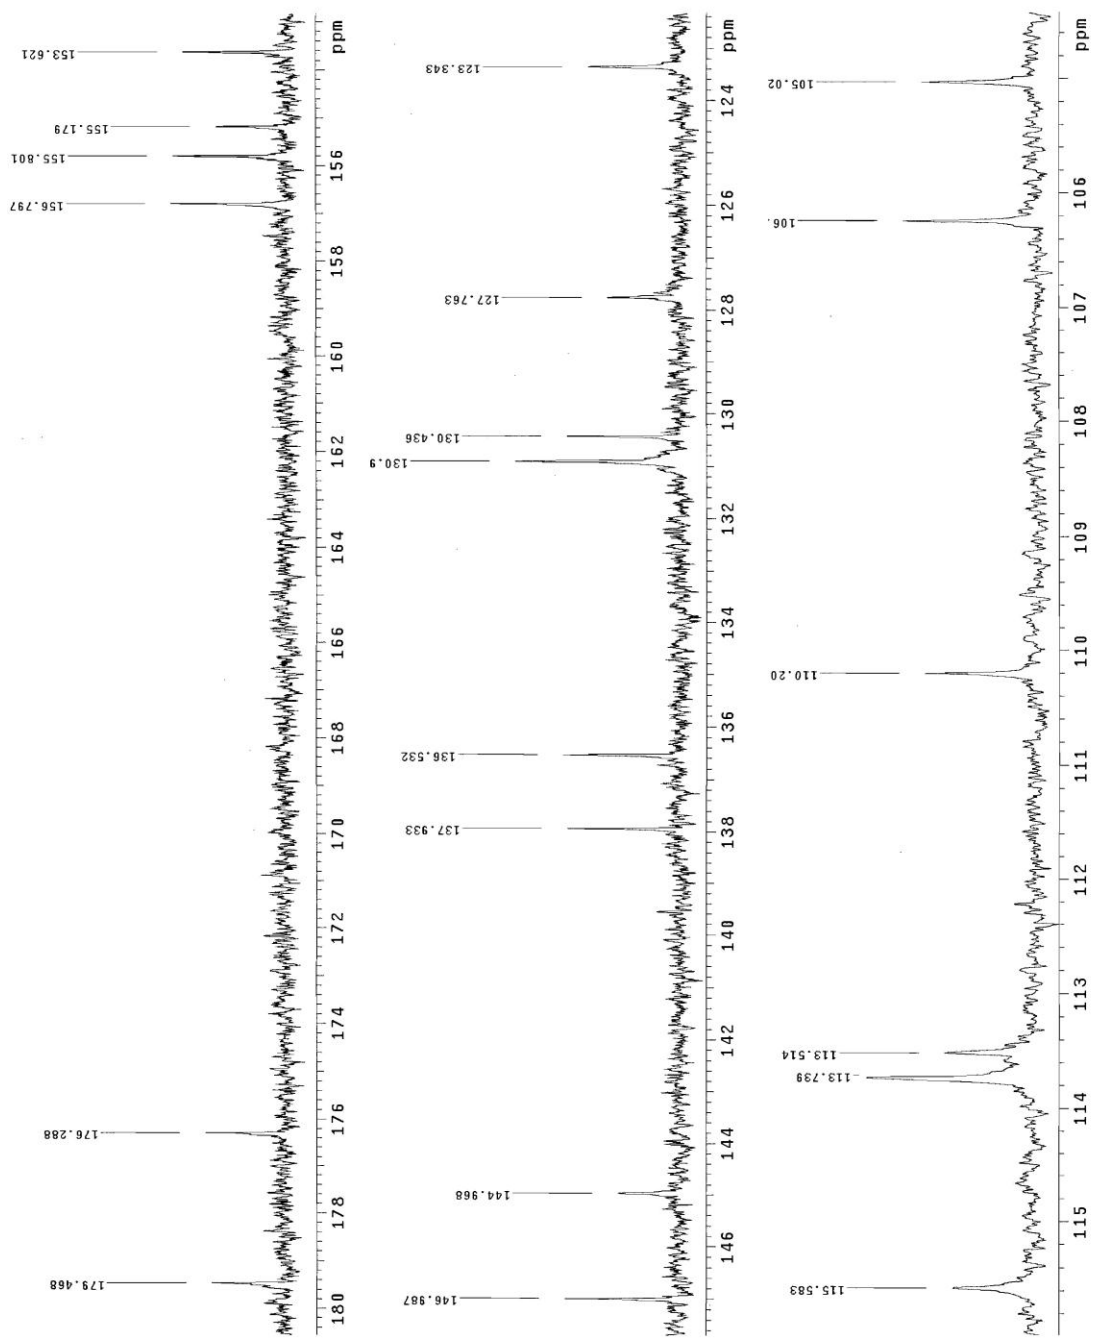

### $^{13}\text{C}$ NMR spectrum of compound 1 in $\text{CDCl}_3$

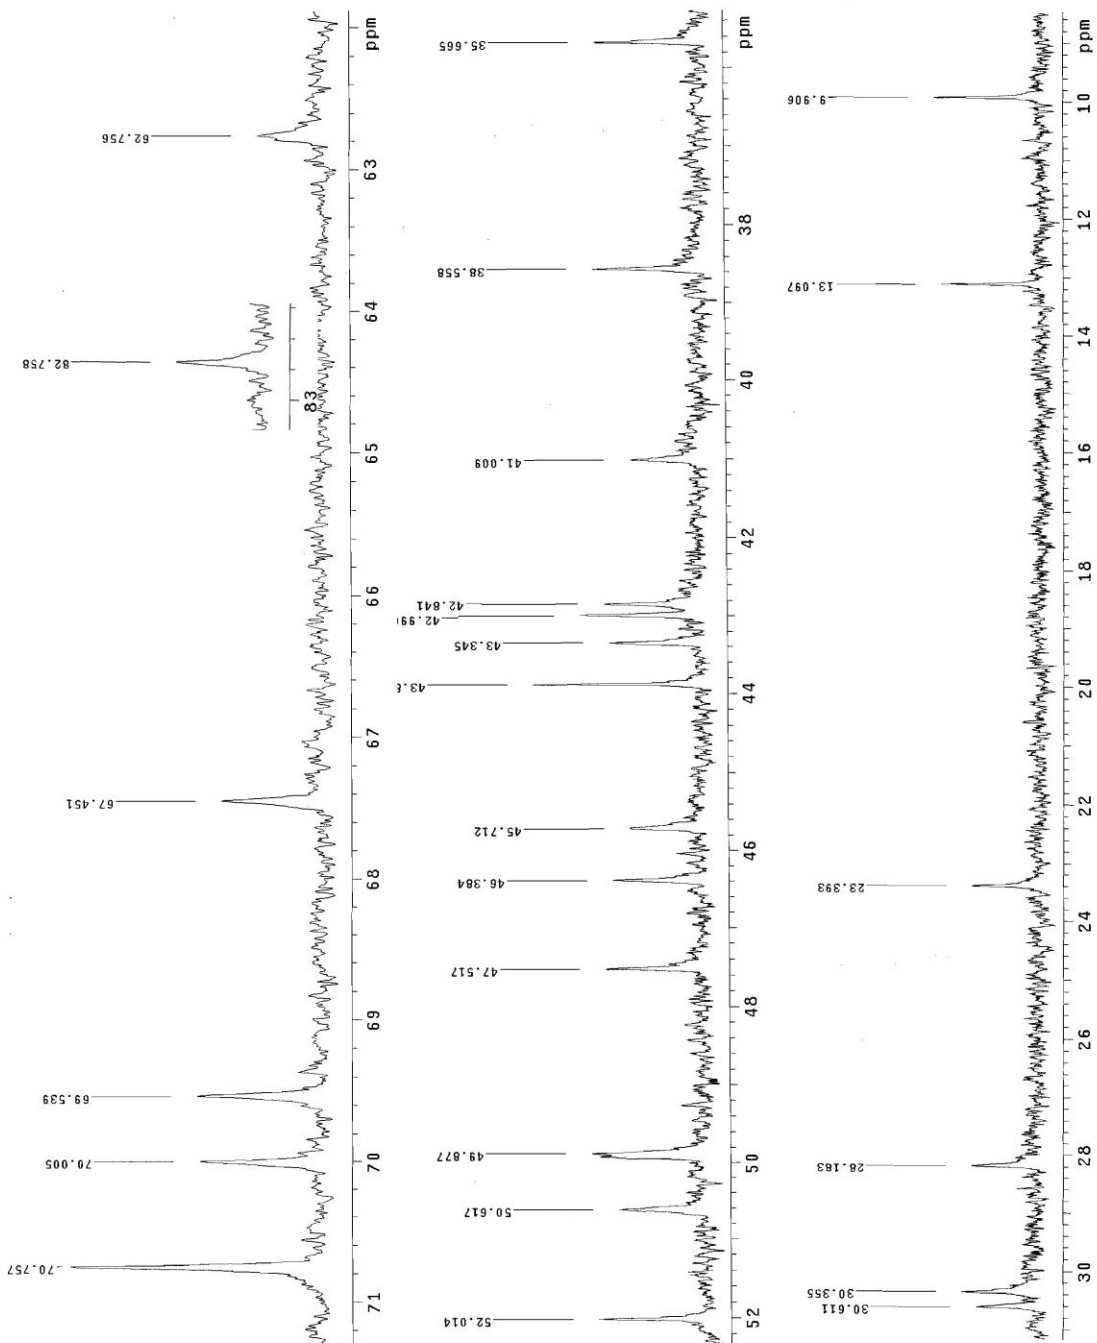

**$^{13}\text{C}$  NMR spectrum of compound 1 in  $\text{CDCl}_3$**

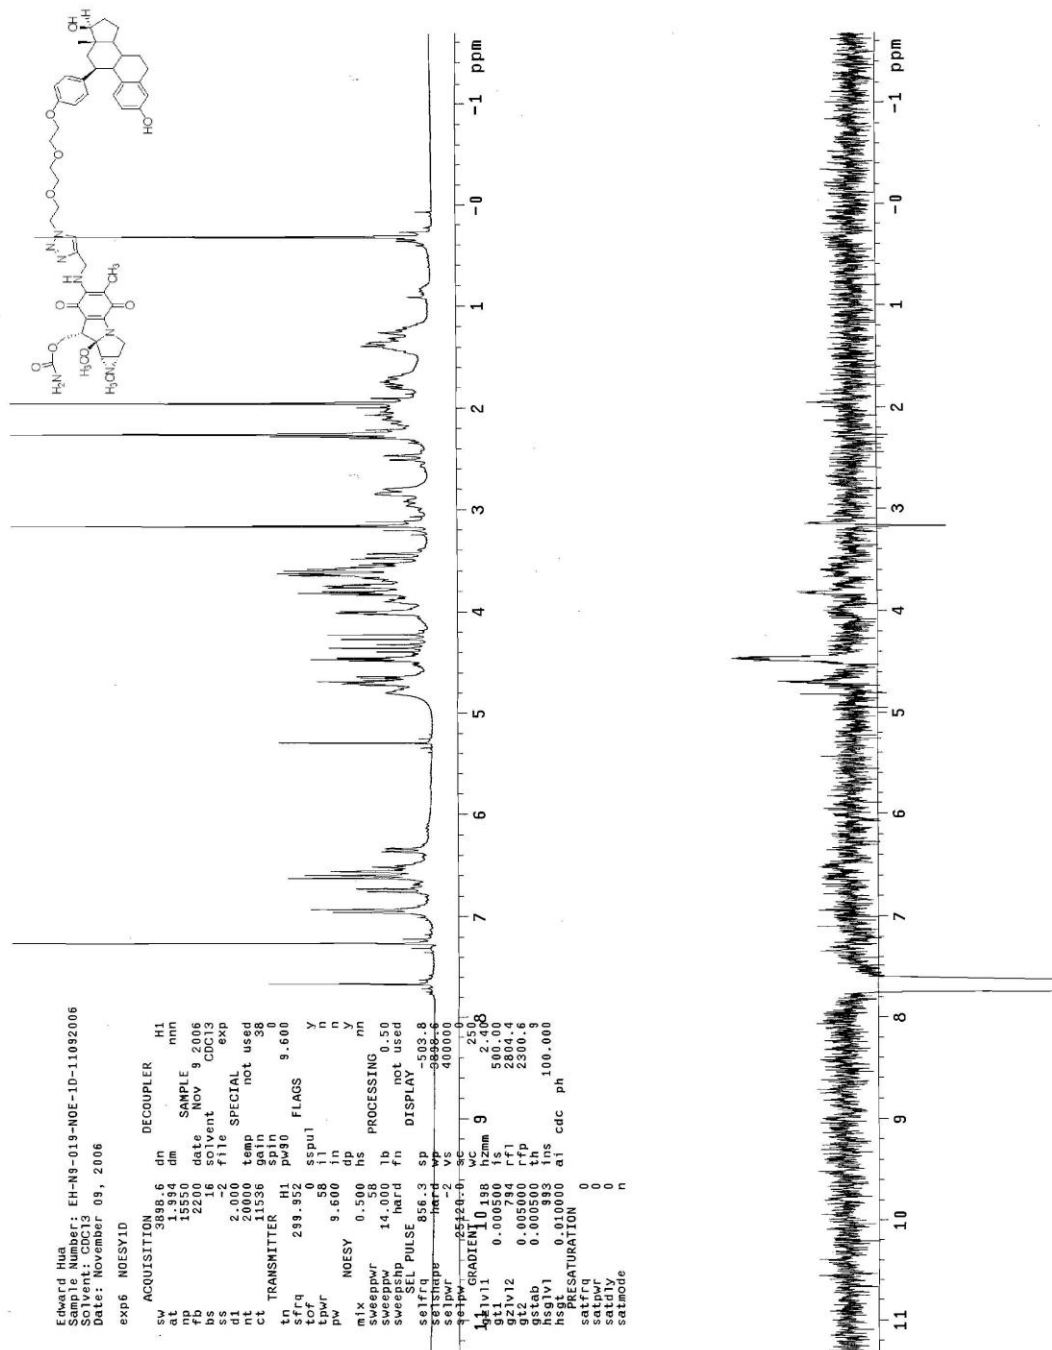

1D NOESY of compound 1 in CDCl<sub>3</sub>

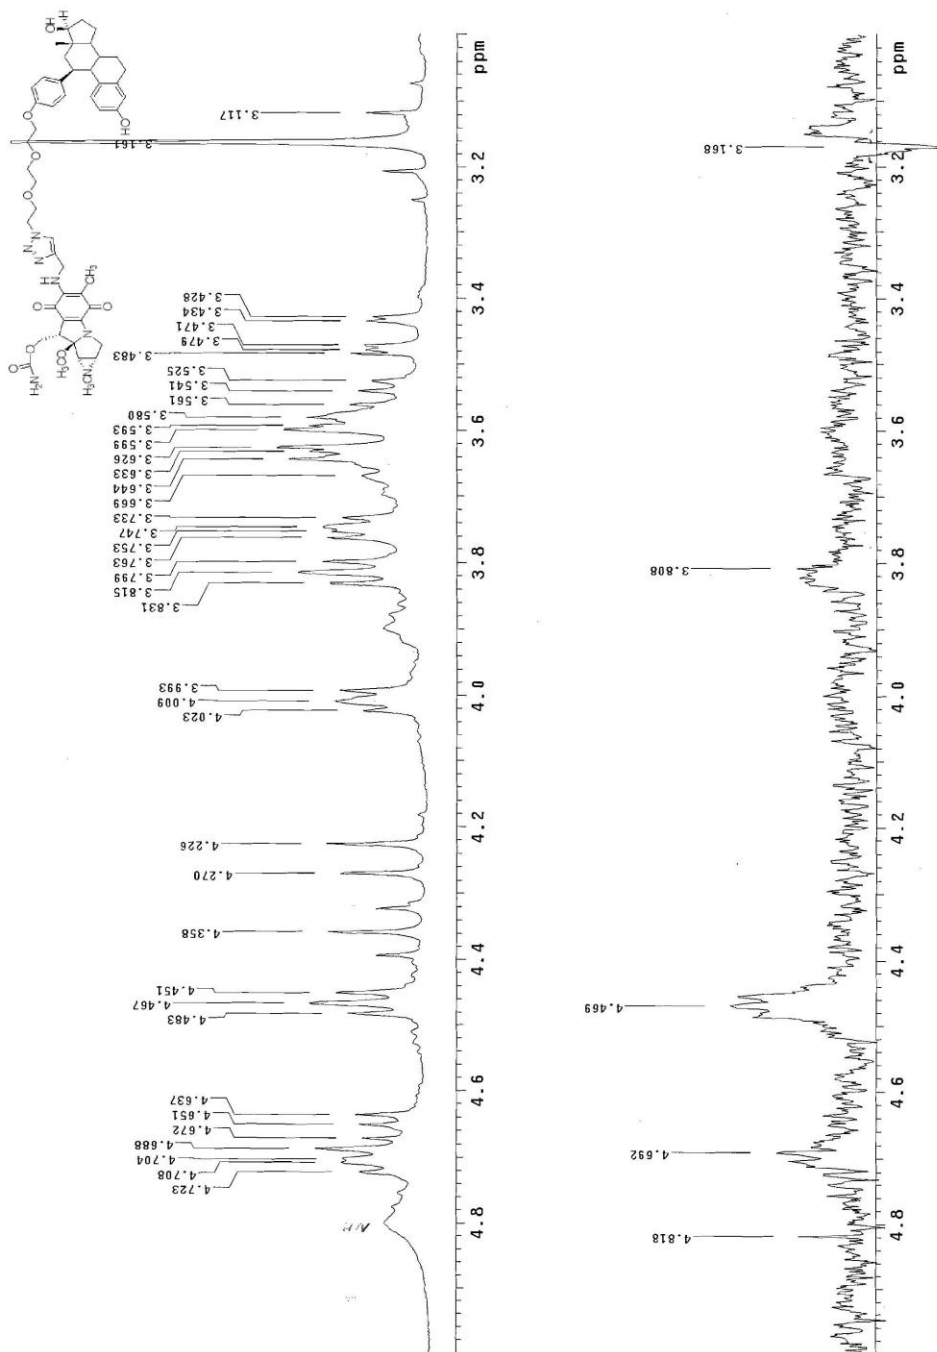

1D NOESY of compound 1 in CDCl<sub>3</sub>

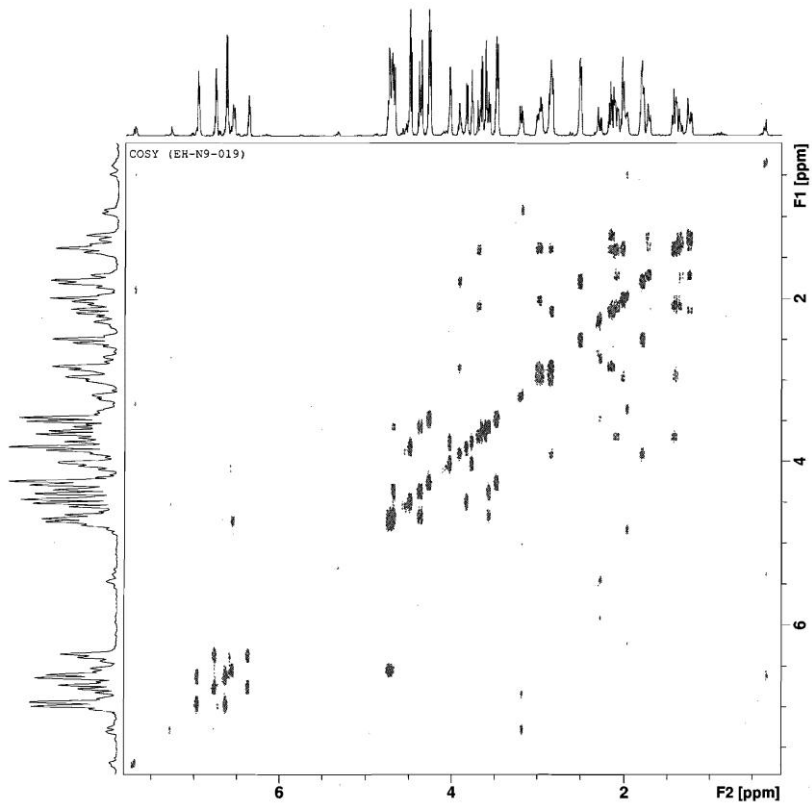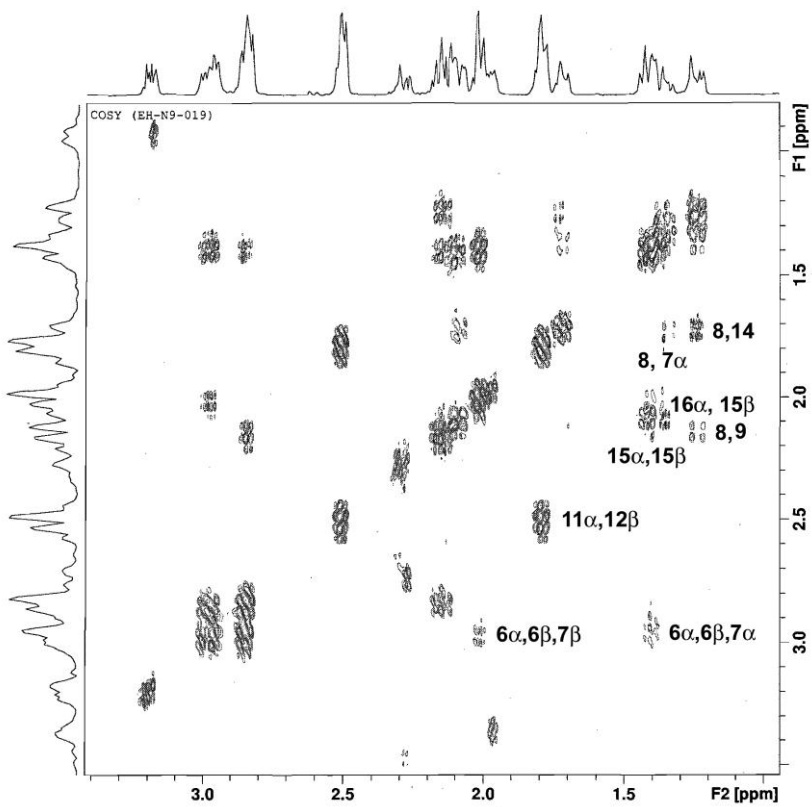

COSY of compound 1 in CDCl<sub>3</sub> (1)



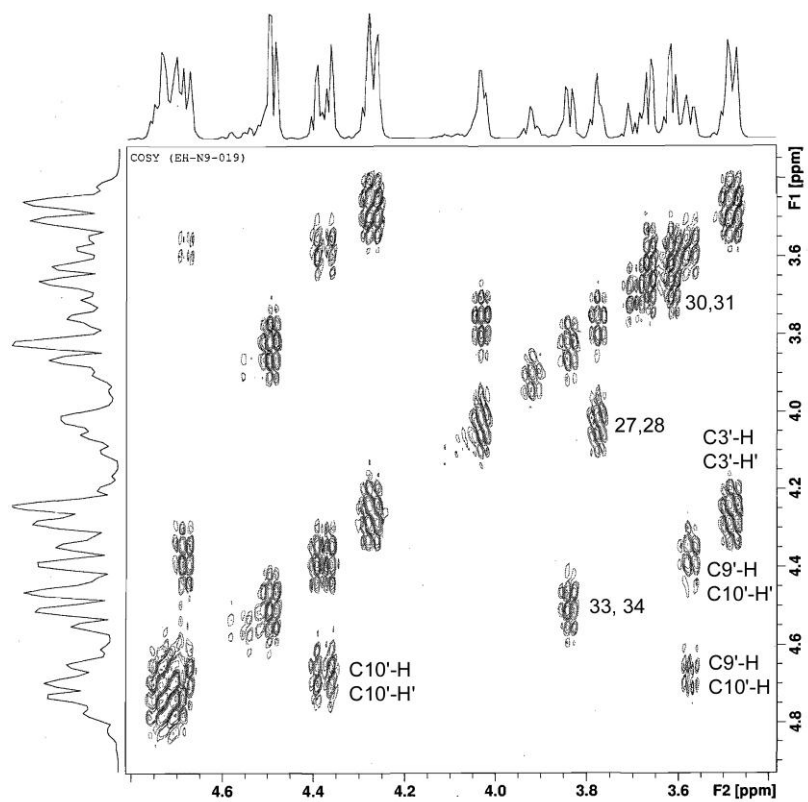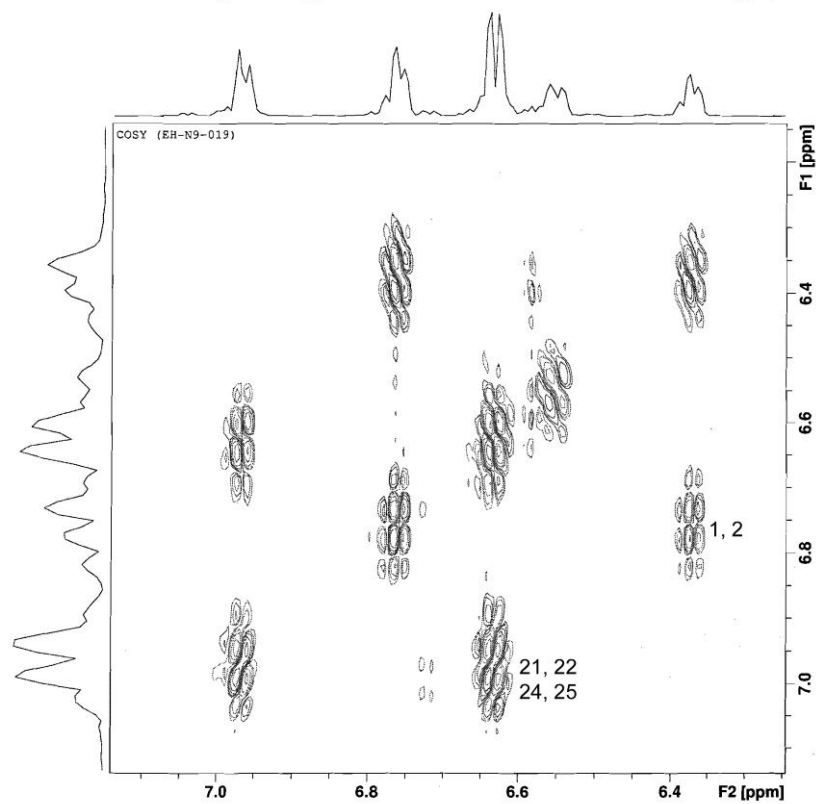

### COSY of compound **1** in CDCl<sub>3</sub> (2)

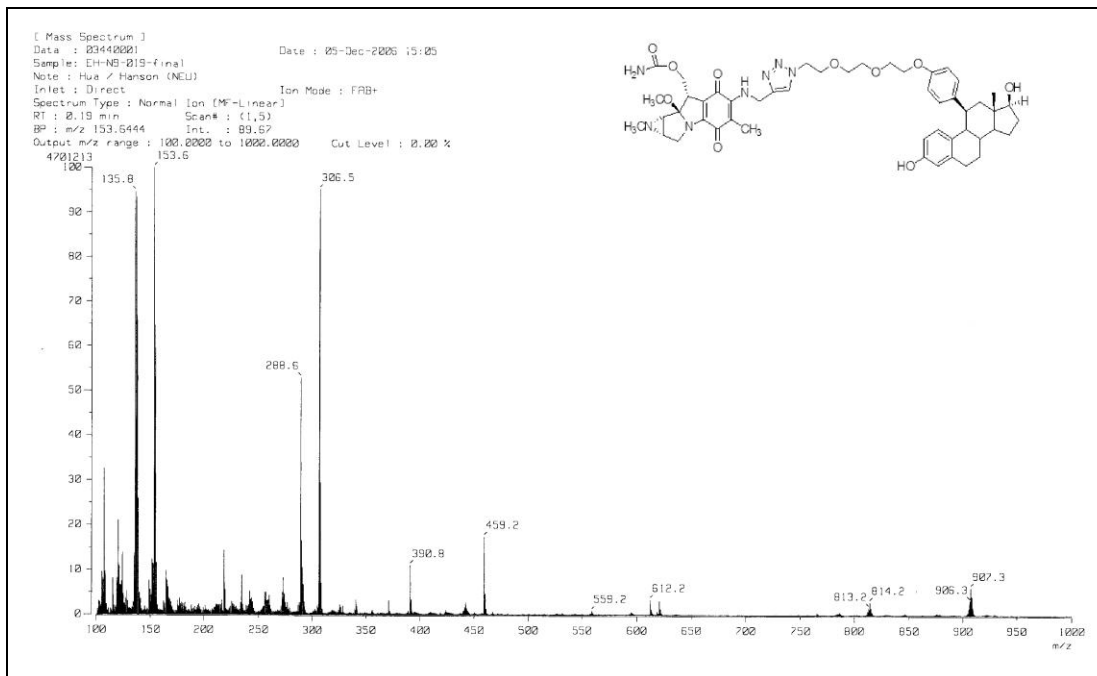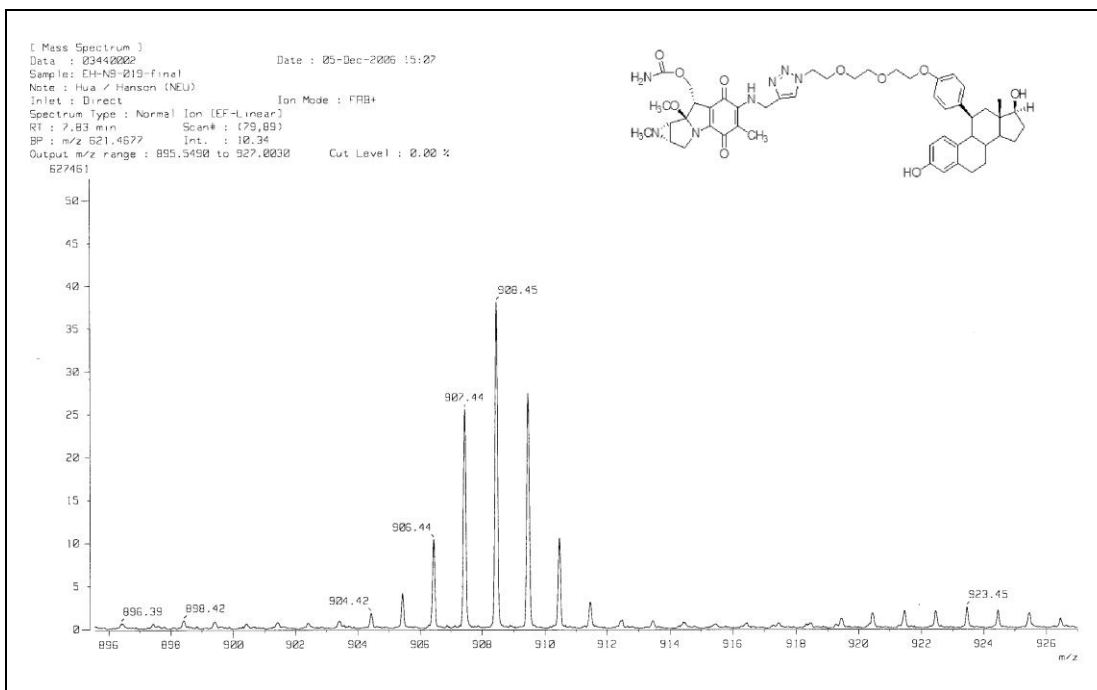

### HRMS of compound **1**
